# Supplementary material for: Spontaneous Magnetic Alignment by Yearling Snapping Turtles: Rapid Association of Radio Frequency Dependent Pattern of Magnetic Input with Novel Surroundings
Source: PubMed Central journal article supplement (PMC4433231; doi:10.1371/journal.pone.0124728), 2015-05-15
Supplement: pone.0124728.s003.pdf [file pone.0124728.s003.pdf]

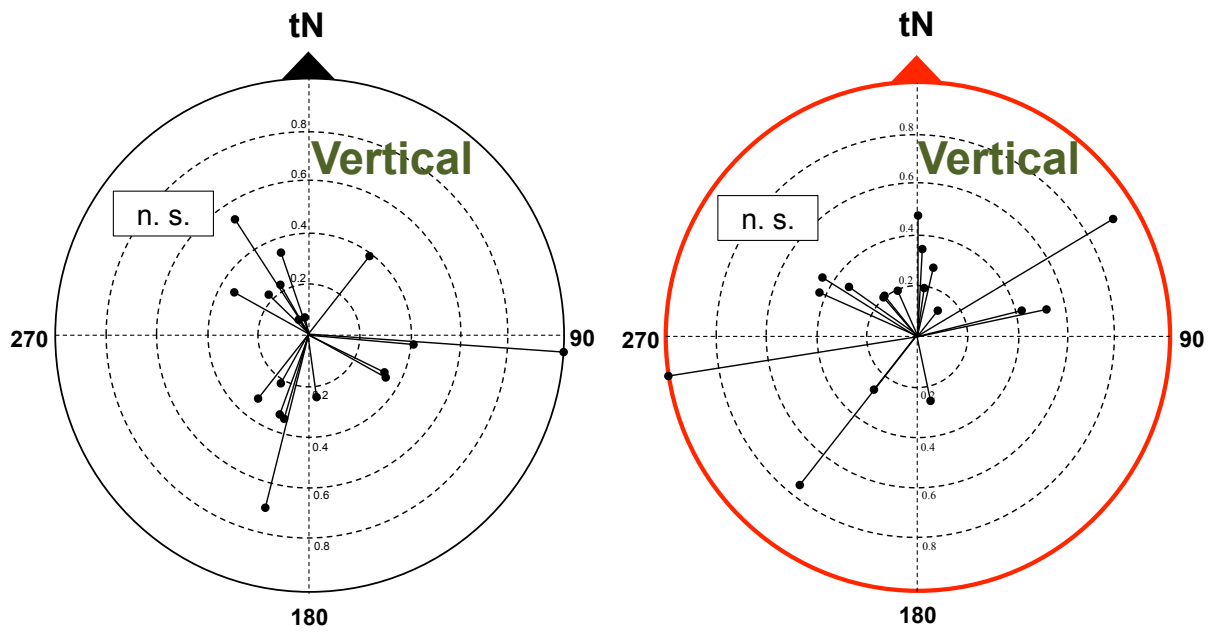

**S1 Fig. Alignment in vertical magnetic field.** The results of the vertical field treatments (no RF was applied during this treatment). The results show random orientation for the days with (red outer circle) and without (black outer circle) RF acclimation. Moore's modified Rayleigh test was used to test each distribution for significant unimodal alignment.
