# Supplementary material for: Spontaneous Magnetic Alignment by Yearling Snapping Turtles: Rapid Association of Radio Frequency Dependent Pattern of Magnetic Input with Novel Surroundings
Source: PubMed Central journal article supplement (PMC4433231; doi:10.1371/journal.pone.0124728), 2015-05-15
Supplement: pone.0124728.s004.pdf [file pone.0124728.s004.pdf]

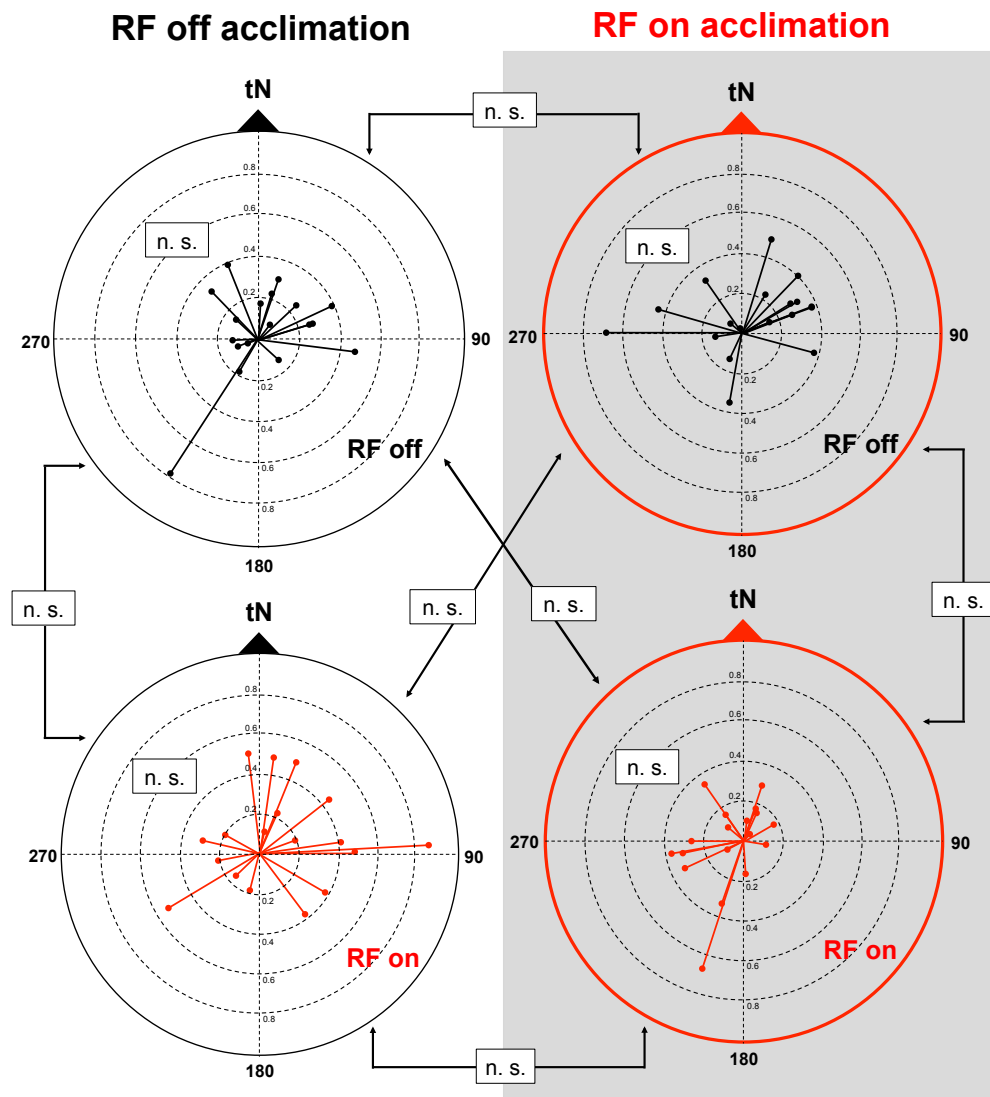

**S2 Fig. Topographic component of responses.** The results combining the 4 magnetic field treatments (N, E, S, W), however, analyzed with regard to the topographic (geographic) north, showing that there is no topographic bias in the data. RF off acclimated animals are shown with a black outer circle, RF on acclimated animals with a red outer circle. Moore's modified Rayleigh test was used to test each distribution for significant unimodal alignment. Dependent data (alignment of same individuals in the two treatments RF off and RF on) were tested for significant differences using the Moore's paired sample test. Independent data were tested for significant differences using the Mardia's two-sample test.
